# Supplementary material for: Genetic Interaction of SEEDSTICK, GORDITA and AUXIN RESPONSE FACTOR 2 during Seed Development
Source: MDPI journal article supplement (doi:10.3390/genes12081189), 2021-07-30
Supplement: s1 [file s1]

**Table S2.** Data related to size distribution reported in Figure 5. In the central diagonal the average mean of cell number and cell length in oi2 and ii1 layers in ovules (0 DAP) and in seeds derived from crosses with WT pollen (4 DAP) is reported. Each mean represents at least 10 seeds. The statistical difference among the different genotype was calculated based on Tukey HSD test ( \* =  $p \leq 0.05$ ; \*\* =  $p \leq 0.01$ ).

| 0 DAP | oi2 | Number              | Col-0        | <i>stk</i>   | <i>goa</i> | <i>arf2</i>  | <i>stk goa</i> | <i>stk arf2</i> | <i>goa arf2</i> | <i>stk goa arf2</i> |
|-------|-----|---------------------|--------------|--------------|------------|--------------|----------------|-----------------|-----------------|---------------------|
|       |     | Col-0               | 32.21 ± 5.18 | n.s.         | n.s.       | **           | n.s.           | **              | **              | n.s.                |
|       |     | <i>stk</i>          | n.s.         | 35.67 ± 5.43 | n.s.       | *            | n.s.           | n.s.            | n.s.            | n.s.                |
|       |     | <i>goa</i>          | n.s.         | n.s.         | 34 ± 4.64  | *            | n.s.           | n.s.            | n.s.            | n.s.                |
|       |     | <i>arf2</i>         | **           | *            | *          | 42.83 ± 6.29 | **             | n.s.            | n.s.            | n.s.                |
|       |     | <i>stk goa</i>      | n.s.         | n.s.         | n.s.       | **           | 33.79 ± 2.89   | n.s.            | *               | n.s.                |
|       |     | <i>stk arf2</i>     | **           | n.s.         | n.s.       | n.s.         | n.s.           | 38.07 ± 4.04    | n.s.            | n.s.                |
|       |     | <i>goa arf2</i>     | **           | n.s.         | n.s.       | n.s.         | *              | n.s.            | 40.43 ± 4.24    | n.s.                |
|       |     | <i>stk goa arf2</i> | n.s.         | n.s.         | n.s.       | n.s.         | n.s.           | n.s.            | n.s.            | 36.71 ± 2.06        |

  

| 0 DAP | oi2 | Length              | Col-0        | <i>stk</i>   | <i>goa</i>   | <i>arf2</i>  | <i>stk goa</i> | <i>stk arf2</i> | <i>goa arf2</i> | <i>stk goa arf2</i> |
|-------|-----|---------------------|--------------|--------------|--------------|--------------|----------------|-----------------|-----------------|---------------------|
|       |     | Col-0               | 12.08 ± 1.13 | n.s.         | n.s.         | **           | n.s.           | n.s.            | n.s.            | **                  |
|       |     | <i>stk</i>          | n.s.         | 11.82 ± 0.88 | n.s.         | *            | n.s.           | n.s.            | n.s.            | n.s.                |
|       |     | <i>goa</i>          | n.s.         | n.s.         | 11.86 ± 1.19 | *            | n.s.           | n.s.            | n.s.            | n.s.                |
|       |     | <i>arf2</i>         | **           | *            | *            | 10.18 ± 0.98 | **             | n.s.            | n.s.            | **                  |
|       |     | <i>stk goa</i>      | n.s.         | n.s.         | n.s.         | **           | 12.28 ± 0.81   | *               | **              | n.s.                |
|       |     | <i>stk arf2</i>     | n.s.         | n.s.         | n.s.         | n.s.         | *              | 11.04 ± 0.82    | n.s.            | n.s.                |
|       |     | <i>goa arf2</i>     | n.s.         | n.s.         | n.s.         | n.s.         | **             | n.s.            | 11.6 ± 1.06     | n.s.                |
|       |     | <i>stk goa arf2</i> | **           | n.s.         | n.s.         | **           | n.s.           | n.s.            | n.s.            | 10.37 ± 0.91        |

  

| 0 DAP | ii1 | Number         | Col-0        | <i>stk</i>   | <i>goa</i> | <i>arf2</i> | <i>stk goa</i> | <i>stk arf2</i> | <i>goa arf2</i> | <i>stk goa arf2</i> |
|-------|-----|----------------|--------------|--------------|------------|-------------|----------------|-----------------|-----------------|---------------------|
|       |     | Col-0          | 19.83 ± 4.42 | n.s.         | n.s.       | n.s.        | n.s.           | n.s.            | **              | **                  |
|       |     | <i>stk</i>     | n.s.         | 19.33 ± 3.12 | n.s.       | n.s.        | n.s.           | n.s.            | *               | *                   |
|       |     | <i>goa</i>     | n.s.         | n.s.         | 18 ± 4.72  | n.s.        | n.s.           | n.s.            | **              | *                   |
|       |     | <i>arf2</i>    | n.s.         | n.s.         | n.s.       | 22.42 ± 6.3 | n.s.           | n.s.            | n.s.            | n.s.                |
|       |     | <i>stk goa</i> | n.s.         | n.s.         | n.s.       | n.s.        | 20.79 ± 4.32   | n.s.            | *               | n.s.                |

|                     |      |      |      |      |      |             |              |              |
|---------------------|------|------|------|------|------|-------------|--------------|--------------|
| <i>stk arf2</i>     | n.s. | n.s. | n.s. | n.s. | n.s. | 23.94 ± 5.2 | n.s.         | n.s.         |
| <i>goa arf2</i>     | **   | *    | **   | n.s. | *    | n.s.        | 26.07 ± 2.73 | n.s.         |
| <i>stk goa arf2</i> | **   | *    | *    | n.s. | n.s. | n.s.        | n.s.         | 27.14 ± 2.61 |

|       |     |                     |             |             |             |             |                |                 |                 |                     |
|-------|-----|---------------------|-------------|-------------|-------------|-------------|----------------|-----------------|-----------------|---------------------|
| 0 DAP | ii1 | Length              | Col-0       | <i>stk</i>  | <i>goa</i>  | <i>arf2</i> | <i>stk goa</i> | <i>stk arf2</i> | <i>goa arf2</i> | <i>stk goa arf2</i> |
|       |     | Col-0               | 8.23 ± 0.97 | n.s.        | n.s.        | *           | n.s.           | **              | n.s.            | n.s.                |
|       |     | <i>stk</i>          | n.s.        | 8.16 ± 0.85 | n.s.        | n.s.        | n.s.           | **              | n.s.            | n.s.                |
|       |     | <i>goa</i>          | n.s.        | n.s.        | 7.47 ± 0.64 | n.s.        | n.s.           | n.s.            | n.s.            | n.s.                |
|       |     | <i>arf2</i>         | *           | n.s.        | n.s.        | 6.90 ± 1.05 | **             | n.s.            | n.s.            | n.s.                |
|       |     | <i>stk goa</i>      | n.s.        | n.s.        | n.s.        | **          | 8.57 ± 1.22    | **              | n.s.            | n.s.                |
|       |     | <i>stk arf2</i>     | **          | **          | n.s.        | n.s.        | **             | 6.55 ± 1.16     | **              | n.s.                |
|       |     | <i>goa arf2</i>     | n.s.        | n.s.        | n.s.        | n.s.        | n.s.           | **              | 7.99 ± 0.91     | n.s.                |
|       |     | <i>stk goa arf2</i> | n.s.        | n.s.        | n.s.        | n.s.        | n.s.           | n.s.            | n.s.            | 7.49 ± 0.93         |

|       |     |                     |              |             |            |              |                |                 |                 |                     |
|-------|-----|---------------------|--------------|-------------|------------|--------------|----------------|-----------------|-----------------|---------------------|
| 4 DAP | oi2 | Number              | Col-0        | <i>stk</i>  | <i>goa</i> | <i>arf2</i>  | <i>stk goa</i> | <i>stk arf2</i> | <i>goa arf2</i> | <i>stk goa arf2</i> |
|       |     | Col-0               | 48.73 ± 5.92 | n.s.        | n.s.       | **           | n.s.           | *               | n.s.            | n.s.                |
|       |     | <i>stk</i>          | n.s.         | 44.6 ± 4.55 | n.s.       | **           | n.s.           | **              | n.s.            | **                  |
|       |     | <i>goa</i>          | n.s.         | n.s.        | 42.4 ± 2.8 | **           | n.s.           | **              | n.s.            | **                  |
|       |     | <i>arf2</i>         | **           | **          | **         | 57.71 ± 6.13 | **             | n.s.            | **              | n.s.                |
|       |     | <i>stk goa</i>      | n.s.         | n.s.        | n.s.       | **           | 44.71 ± 3.40   | **              | n.s.            | *                   |
|       |     | <i>stk arf2</i>     | *            | **          | **         | n.s.         | **             | 55.6 ± 5.1      | **              | n.s.                |
|       |     | <i>goa arf2</i>     | n.s.         | n.s.        | n.s.       | **           | n.s.           | **              | 42.5 ± 3.99     | **                  |
|       |     | <i>stk goa arf2</i> | n.s.         | **          | **         | n.s.         | *              | n.s.            | **              | 53.1 ± 6.1          |

|       |     |                 |              |              |              |              |                |                 |                 |                     |
|-------|-----|-----------------|--------------|--------------|--------------|--------------|----------------|-----------------|-----------------|---------------------|
| 4 DAP | oi2 | Length          | Col-0        | <i>stk</i>   | <i>goa</i>   | <i>arf2</i>  | <i>stk goa</i> | <i>stk arf2</i> | <i>goa arf2</i> | <i>stk goa arf2</i> |
|       |     | Col-0           | 26.08 ± 2.89 | **           | n.s.         | **           | **             | **              | **              | **                  |
|       |     | <i>stk</i>      | **           | 19.28 ± 1.54 | **           | n.s.         | *              | *               | n.s.            | **                  |
|       |     | <i>goa</i>      | n.s.         | **           | 24.56 ± 1.91 | **           | **             | **              | **              | **                  |
|       |     | <i>arf2</i>     | **           | n.s.         | **           | 20.89 ± 2.52 | **             | **              | n.s.            | **                  |
|       |     | <i>stk goa</i>  | **           | *            | **           | **           | 16.24 ± 1.41   | n.s.            | n.s.            | n.s.                |
|       |     | <i>stk arf2</i> | **           | *            | **           | **           | n.s.           | 16.43 ± 1.66    | n.s.            | n.s.                |

|  |  |                     |    |     |    |     |     |     |              |              |
|--|--|---------------------|----|-----|----|-----|-----|-----|--------------|--------------|
|  |  | <i>goa arf2</i>     | ** | n.s | ** | n.s | n.s | n.s | 18.42 ± 0.72 | n.s          |
|  |  | <i>stk goa arf2</i> | ** | **  | ** | **  | n.s | n.s | n.s          | 15.72 ± 1.65 |

|       |     |                     |             |              |            |             |                |                 |                 |                     |
|-------|-----|---------------------|-------------|--------------|------------|-------------|----------------|-----------------|-----------------|---------------------|
| 4 DAP | ii1 | Number              | Col-0       | <i>stk</i>   | <i>goa</i> | <i>arf2</i> | <i>stk goa</i> | <i>stk arf2</i> | <i>goa arf2</i> | <i>stk goa arf2</i> |
|       |     | Col-0               | 30.4 ± 4.33 | n.s          | n.s        | n.s         | n.s            | *               | n.s             | n.s                 |
|       |     | <i>stk</i>          | n.s         | 25.56 ± 3.05 | n.s        | n.s         | n.s            | **              | n.s             | *                   |
|       |     | <i>goa</i>          | n.s         | n.s          | 30 ± 3.55  | n.s         | n.s            | *               | n.s             | n.s                 |
|       |     | <i>arf2</i>         | n.s         | n.s          | n.s        | 35 ± 3.16   | n.s            | n.s             | n.s             | n.s                 |
|       |     | <i>stk goa</i>      | n.s         | n.s          | n.s        | n.s         | 28.33 ± 6.59   | *               | n.s             | *                   |
|       |     | <i>stk arf2</i>     | *           | **           | *          | n.s         | *              | 39.4 ± 9.26     | *               | n.s                 |
|       |     | <i>goa arf2</i>     | n.s         | n.s          | n.s        | n.s         | n.s            | *               | 28.4 ± 3.85     | n.s                 |
|       |     | <i>stk goa arf2</i> | n.s         | *            | n.s        | n.s         | *              | n.s             | n.s             | 38.5 ± 8.58         |

|       |     |                     |           |              |              |              |                |                 |                 |                     |
|-------|-----|---------------------|-----------|--------------|--------------|--------------|----------------|-----------------|-----------------|---------------------|
| 4 DAP | ii1 | Length              | Col-0     | <i>stk</i>   | <i>goa</i>   | <i>arf2</i>  | <i>stk goa</i> | <i>stk arf2</i> | <i>goa arf2</i> | <i>stk goa arf2</i> |
|       |     | Col-0               | 26.94 ± 3 | **           | n.s          | **           | **             | **              | **              | **                  |
|       |     | <i>stk</i>          | **        | 19.04 ± 3.64 | *            | *            | *              | n.s             | n.s             | *                   |
|       |     | <i>goa</i>          | n.s       | *            | 24.28 ± 4.61 | n.s          | **             | **              | **              | **                  |
|       |     | <i>arf2</i>         | **        | *            | n.s          | 24.08 ± 2.34 | **             | **              | **              | **                  |
|       |     | <i>stk goa</i>      | **        | *            | **           | **           | 13.84 ± 2.64   | n.s             | n.s             | n.s                 |
|       |     | <i>stk arf2</i>     | **        | n.s          | **           | **           | n.s            | 15 ± 2.26       | n.s             | n.s                 |
|       |     | <i>goa arf2</i>     | **        | n.s          | **           | **           | n.s            | n.s             | 17.43 ± 1.05    | n.s                 |
|       |     | <i>stk goa arf2</i> | **        | *            | **           | **           | n.s            | n.s             | n.s             | 13.33 ± 2.31        |
