# Supplementary material for: Genetic Interaction of SEEDSTICK, GORDITA and AUXIN RESPONSE FACTOR 2 during Seed Development
Source: MDPI journal article supplement (doi:10.3390/genes12081189), 2021-07-30
Supplement: s1 [file s1]

**Table S1.** Primer pairs used in this work.

| Genotype                    | Primers                           | Sense primers (5' → 3')      | Antisense primers (5' → 3') |
|-----------------------------|-----------------------------------|------------------------------|-----------------------------|
| <i>STK</i> and <i>stk-2</i> | <i>Atp_204</i> / <i>Atp_561</i>   | GCTTGTTCTGATAGCACCAACACTAGCA | GGAACTCAAAGAGTCTCCCATCAG    |
| <i>GOA</i>                  | <i>Atp_3987</i> / <i>Atp_3988</i> | ACATGCTCGAGCTCGCAAG          | ATTCGCCGGCGCAGGATC          |
| <i>goa-1</i>                | <i>Atp_3987</i> / <i>Atp_2060</i> | ACATGCTCGAGCTCGCAAG          | ACTAGTATGTTACGTCCTGTAGAAAC  |
| <i>ARF2</i>                 | <i>Atp_3666</i> / <i>Atp_3667</i> | TGAGTCCTGTTCCAATGCC          | GAAAGATCCACTGAACGGC         |
| <i>arf2-8</i>               | <i>Atp_3666</i> / <i>Atp_1212</i> | TGAGTCCTGTTCCAATGCC          | GCGTGGACCGCTTGCTGCAACT      |
